# Supplementary material for: Cdk5rap2 regulates centrosome function and chromosome segregation in neuronal progenitors
Source: Oxford University Press journal article supplement (doi:10.1242/dev.040410), 2010-05-11
Supplement: dev040410tables1.pdf [file dev040410tables1.pdf]

**Table S1. Hematologic parameters of B6.Cg *an/+* × 129/Sv *Cdk5rap2*<sup>*RRO242*</sup> animals**

| Genotype         | WBC ( $\times 10^3$ /ml) | RBC ( $\times 10^6$ /ml) | HGB (g/dl)      | HCT (%)         | MCV (fl)        | PLT ( $\times 10^6$ /ml) | RETIC (%)        | CHr (pg)        |
|------------------|--------------------------|--------------------------|-----------------|-----------------|-----------------|--------------------------|------------------|-----------------|
| <i>+/+</i>       | 5.47 $\pm$ 1.38*         | 9.05 $\pm$ 0.15*         | 14.9 $\pm$ 0.4* | 46.7 $\pm$ 1.8* | 51.6 $\pm$ 2.6* | 1158 $\pm$ 158           | 2.65 $\pm$ 0.42* | 16.7 $\pm$ 0.3* |
| <i>an/+</i>      | 4.47 $\pm$ 1.42*         | 8.80 $\pm$ 6.65*         | 14.5 $\pm$ 0.9* | 45.6 $\pm$ 1.9* | 52.0 $\pm$ 2.6* | 1127 $\pm$ 105*          | 3.39 $\pm$ 0.41* | 16.6 $\pm$ 0.4* |
| <i>RRO242/+</i>  | 2.62 $\pm$ 0.89          | 9.11 $\pm$ 0.32*         | 15.4 $\pm$ 0.2* | 50.7 $\pm$ 0.7* | 55.7 $\pm$ 2.4* | 1176 $\pm$ 111           | 2.47 $\pm$ 0.13* | 17.2 $\pm$ 0.1* |
| <i>RRO242/an</i> | 1.67 $\pm$ 0.54          | 6.59 $\pm$ 0.45          | 12.9 $\pm$ 0.8  | 42.1 $\pm$ 1.7  | 64.0 $\pm$ 3.4  | 1300 $\pm$ 191           | 4.30 $\pm$ 0.80  | 19.7 $\pm$ 0.6  |

Complete blood counts obtained at 6 weeks of age from F1 animals in a cross segregating the *an* and an insertional gene-trap allele (designated *RRO242*, [http://www.genetrap.org/cgi-bin/annotation.py?gene\\_key=4934](http://www.genetrap.org/cgi-bin/annotation.py?gene_key=4934)). Homozygous wild-type (*+/+*, *n*=6), heterozygous *Hertwig's anemia* (*an/+*, *n*=9), heterozygous gene-trap *Cdk5rap2*<sup>*RRO242*</sup> (*RRO242/+*, *n*=3), and compound heterozygous mutant (*RRO242/an*, *n*=11) animals were examined. Values are presented as the mean  $\pm$  1 s.d.

WBC, white blood cells; RBC, red blood cells; HGB, hemoglobin; HCT, hematocrit; MCV, mean cell volume; PLT, platelets; RETIC, reticulocytes; CHr, mean cellular hemoglobin of the reticulocytes.

\*Denotes two-tailed Student's *t*-test statistical significance values (*P*<0.05) in comparison to the *Cdk5rap2*<sup>*RRO242/an*</sup> genotype.
